# Supplementary material for: Quantum dots tethered membrane type 3 matrix metalloproteinase-targeting peptide for tumor optical imaging
Source: Royal Society of Chemistry journal article supplement (doi:10.1039/c8tb02025f), 2018-01-01
Supplement: c8tb02025f1.pdf [file c8tb02025f1.pdf]

## Supporting information

*for*

### Quantum Dots Tethered Membrane type 3 matrix

#### metalloproteinase-targeting Peptide for Tumor Optical Imaging

Li Ren,<sup>ab</sup> Qinglan Li,<sup>b</sup> Zheng Ma,<sup>c</sup> Ye Wang,<sup>d</sup> Haolong Li,<sup>e</sup> Liqiao Shen,<sup>f</sup> Jihong Yu,<sup>\*b</sup>  
and Xuexun Fang.<sup>\*f</sup>

a. College of Food Science and Engineering, Jilin University, 5333 Xi'an Street, Changchun, Jilin 130062, P. R. China.

b. State Key Laboratory of Inorganic Synthesis and Preparative Chemistry, College of Chemistry, Jilin University, 2699 Qianjin Street, Changchun, Jilin 130012, P. R. China.

c. Department of Thoracic Surgery, Qilu Hospital of Shandong University, 107 Wenhua Road, Jinan 250012, P. R. China.

d. The life science college, Jilin University, Changchun, Jilin 130012, P. R. China.

e. Department of Radiation Oncology, University of California San Francisco, 1450 Third St, San Francisco, CA 94158, USA.

f. Key Laboratory of Molecular Enzymology and Enzyme Engineering of the Ministry of Education, Jilin University, Changchun, Jilin 130012, P. R. China.

\* To whom correspondence should be addressed. E-mail: jihong@jlu.edu.cn, fangxx@jlu.edu.cn.

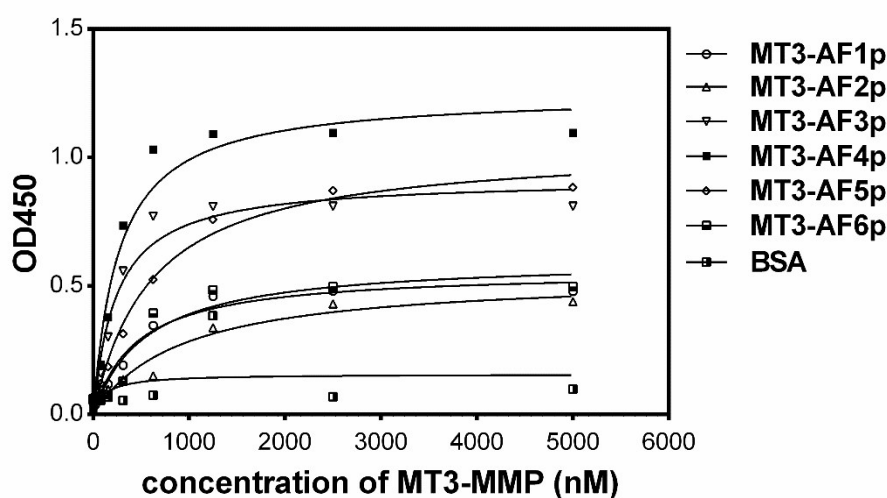

**Figure S1.** The MT3-MMP binding affinity was measured by ELISA and analyzed by GraphPad Prism 5.0 software (n=3).

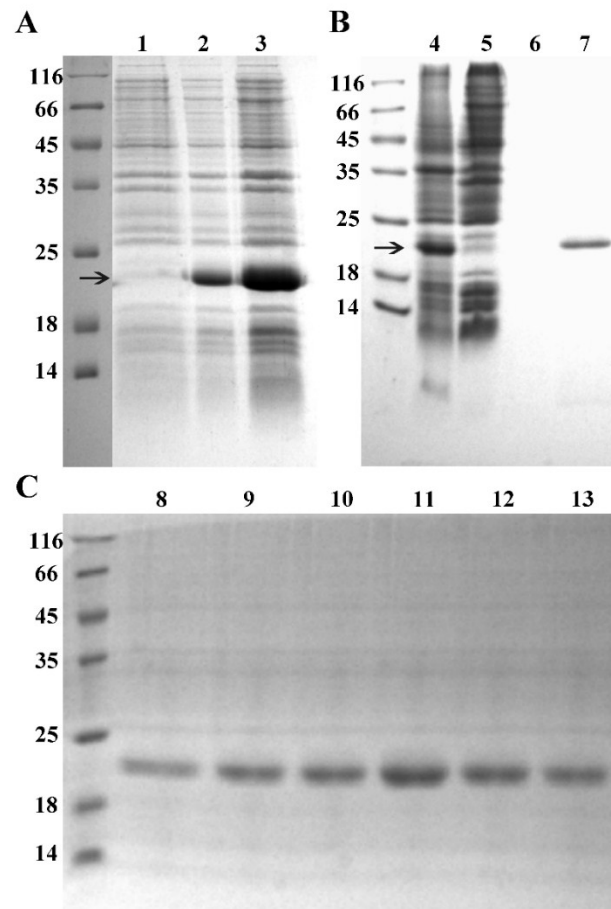

**Figure S2.** Validation of the expression, purification and renaturation of MT3-MMP by SDS-PAGE. Fig. S2A shows the inclusion bodies from the induced culture with IPTG for 0 h (1), 3 h (2) and 4 h (3). Fig.S2B shows the purification of inclusion body by His-tag affinity chromatography before (4) and after (5). The inclusion bodies were purified with 20 mM imidazole (6) and 100 mM (7) imidazole. Fig.S2C shows the MT3-MMP with catalytic activity after renaturation (8-13). Molecular weight (kDa) marker was labeled in numerals. Arrows indicate observed protein bands of interest.

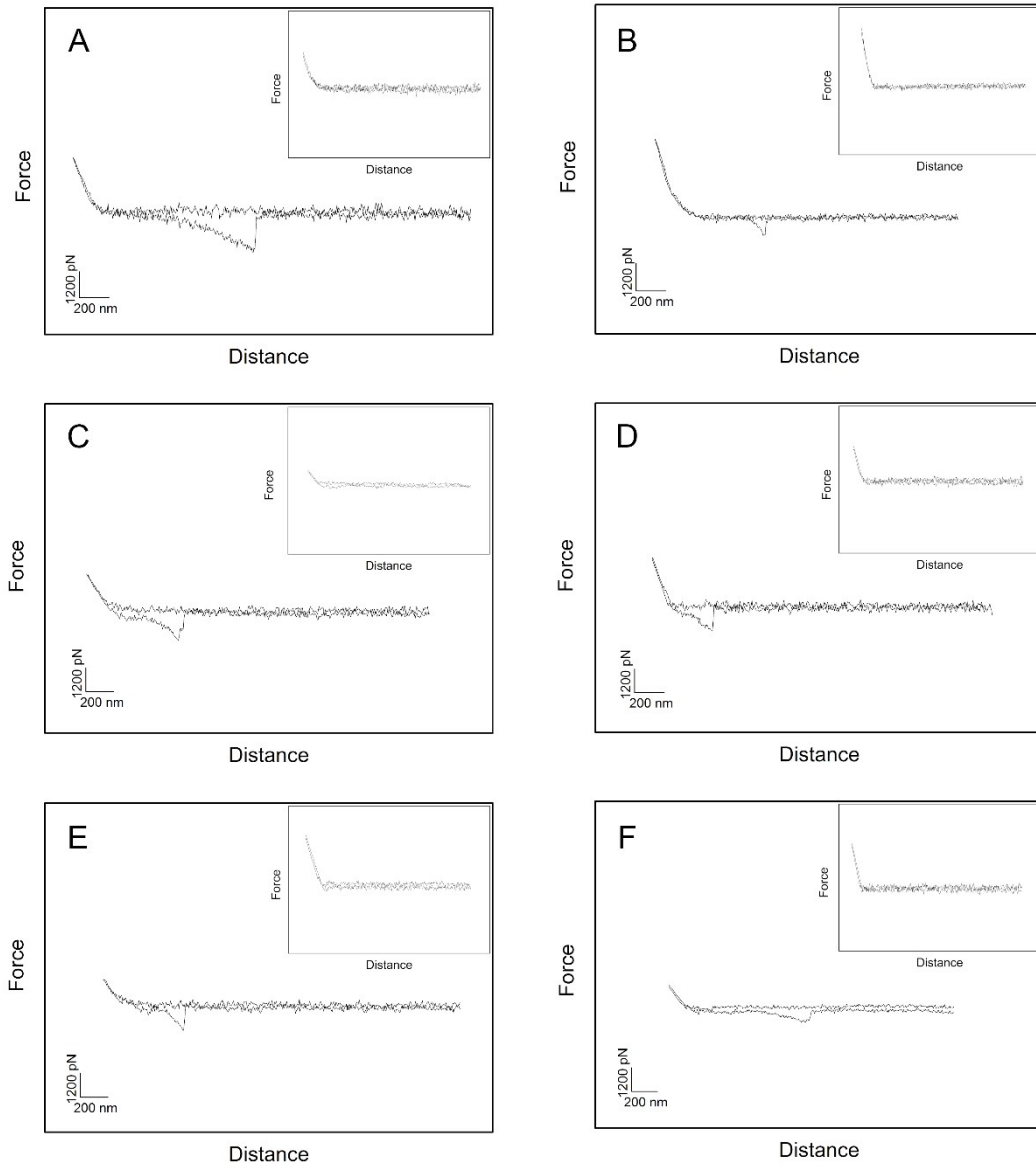

**Figure S3.** Force measurement of MT3-MMP and peptides. Force curves indicating the interactions between MT3-AF1p and MT3-MMP (A), MT3-AF2p and MT3-MMP (B), MT3-AF3p and MT3-MMP (C), MT3-AF4p and MT3-MMP (D), MT3-AF5p and MT3-MMP (E), as well as MT3-AF6p and MT3-MMP (F).

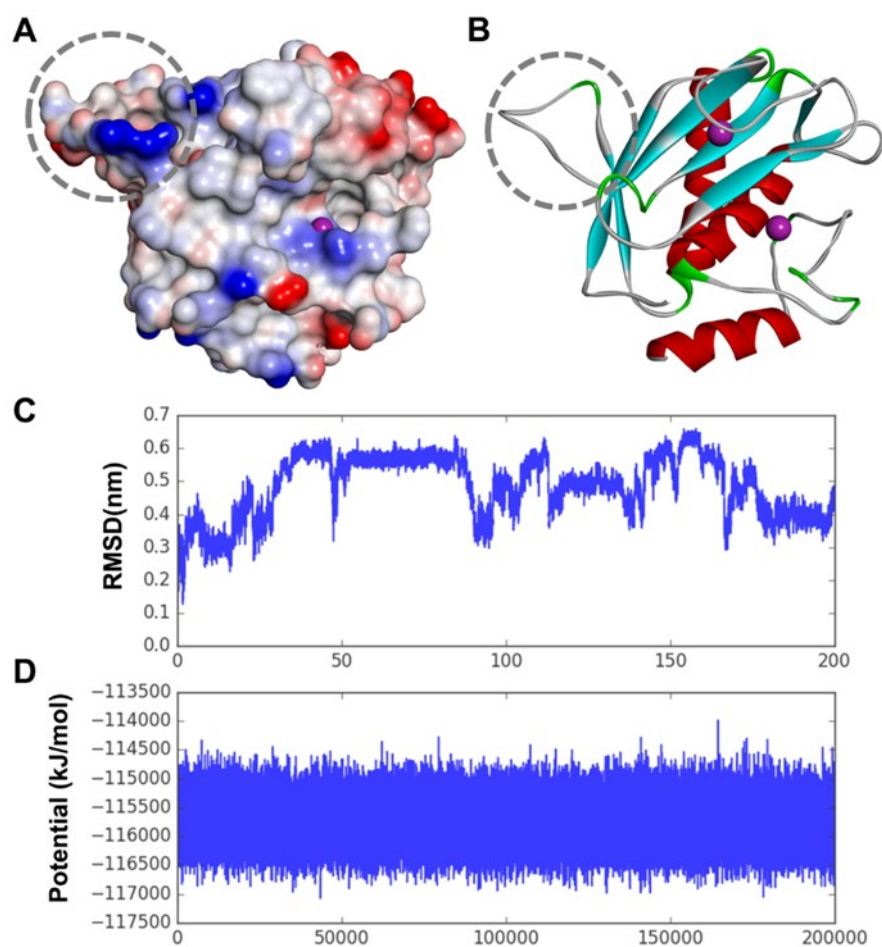

**Figure S4.** Preparation of protein. (A) Conformation of MT3-MMP; (B) Secondary structure of MT3-MMP. The MT-Loop region is shown by the dotted grey circle. (C) and (D) shows the results of MT3-AF4p during 0.1  $\mu$ s MD simulation. (C) RMSD plot. (D) Potential energy.

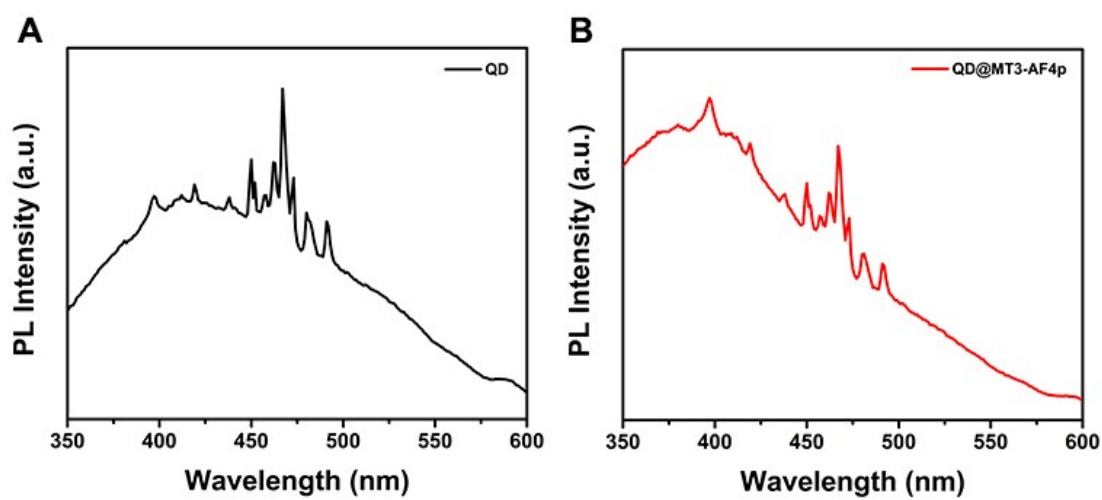

**Figure S5.** The excitation spectra of QD and QD@MT3-AF4p.

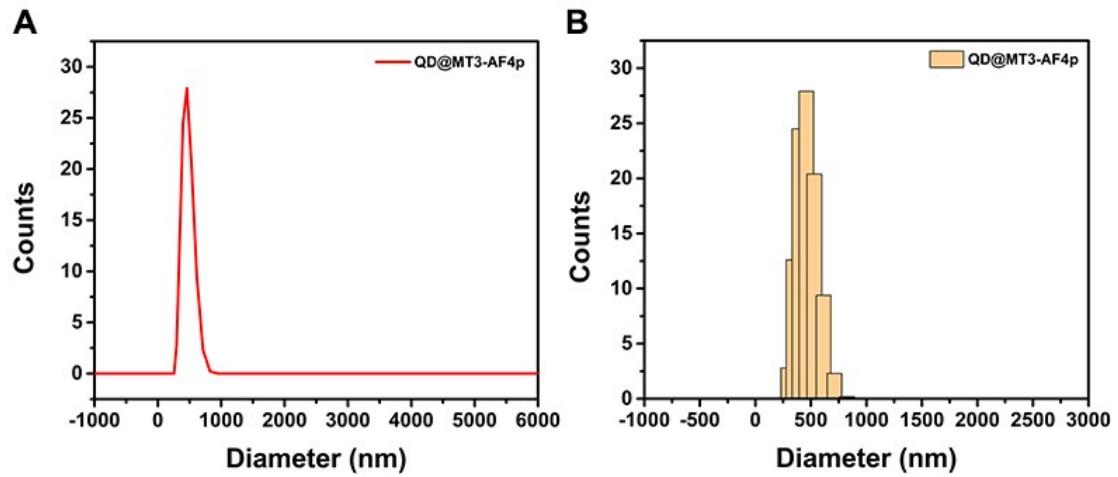

**Figure S6.** DLS characterization of QD@MT3-AF4p nanoparticles. The size distribution were shown in statistics graph (A, B).

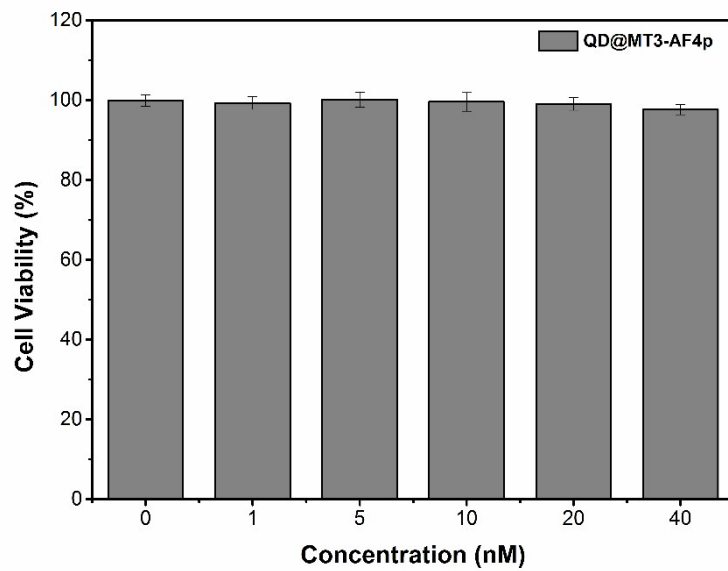

**Figure S7.** The normal cell line (HEK293) is treated with QD@MT3-AF4p, and the MTT assay is used for the assessment of cell viability (n=2).

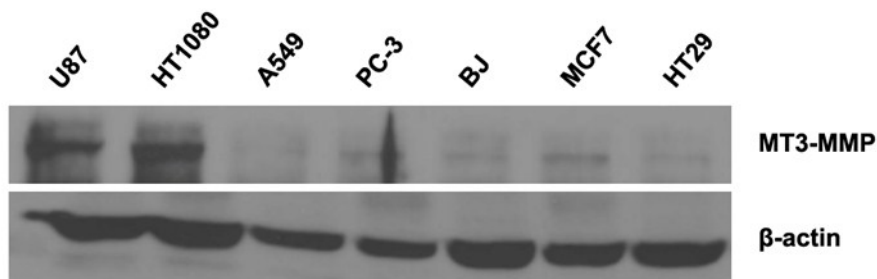

**Figure S8.** Analysis of the expression level of MT3-MMP in U87, HT1080, A549, PC-3, BJ, MCF7 and HT29 tumor cell lines. 40  $\mu$ g of protein samples were loaded and performed to Western blot (n=2).

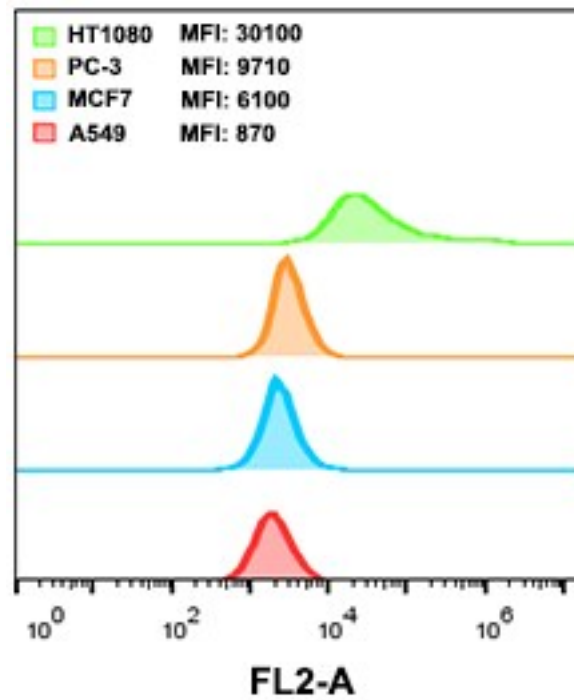

**Figure S9.** Flow cytometry analysis of HT1080, PC-3, MCF7 and A549. Tumor cell lines were incubated with QD@MT3-AF4p for 4 hours at a concentration of 20 nM. MFI: the mean fluorescence emission intensity.

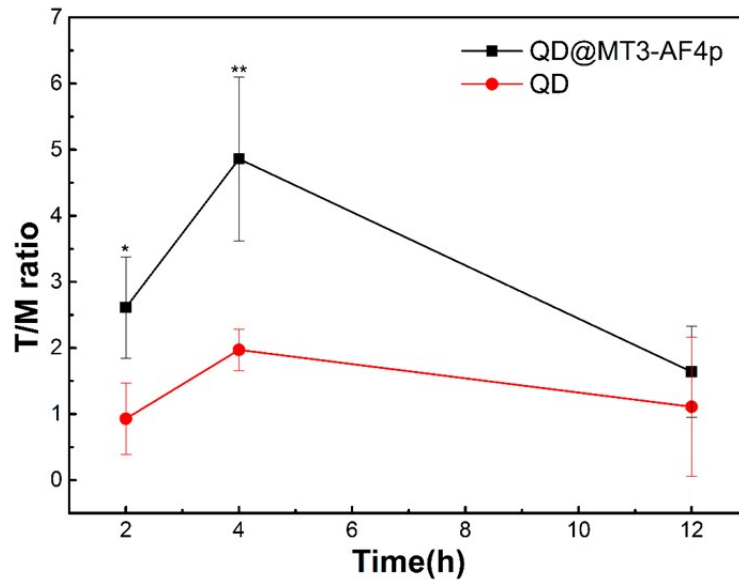

**Figure S10.** Tumor/muscle ratio revealed that the accumulating effects of QD@MT3-AF4p on HT1080 tumor bearing mice (n=3). \* represents p-value  $\leq 0.05$ , \*\* represents p-value  $\leq 0.01$ .

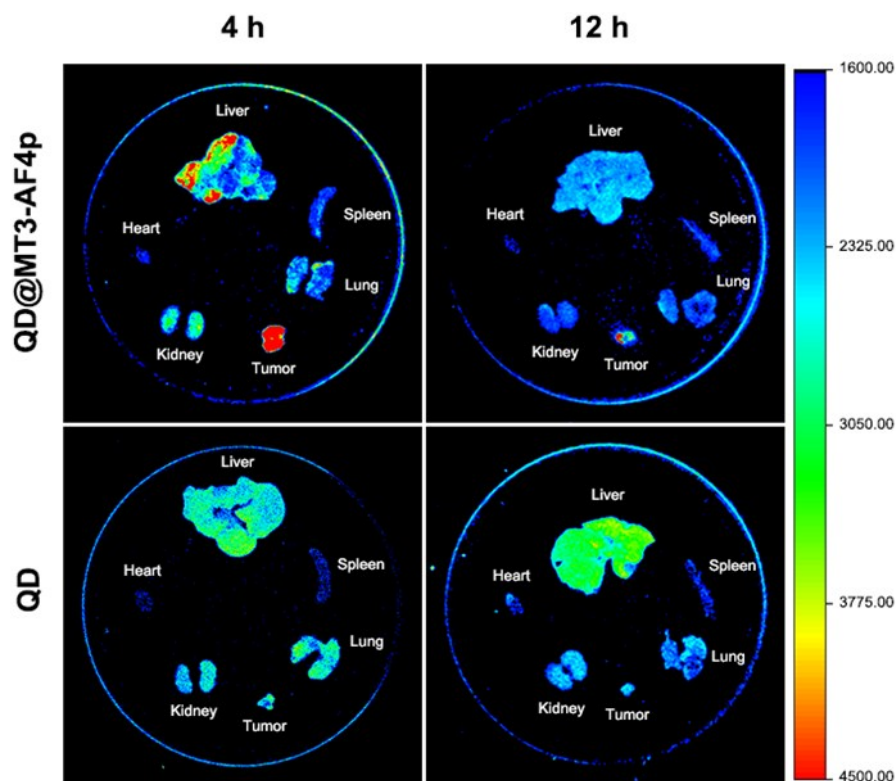

**Figure S11.** *Ex vivo* images of dissected organs of mice bearing HT1080 tumor showed a significant accumulating effect in tumor. The mice were sacrificed after intravenous injection of QD@ MT3-AF4p or QDs for 4 h and 12 h (n=3).

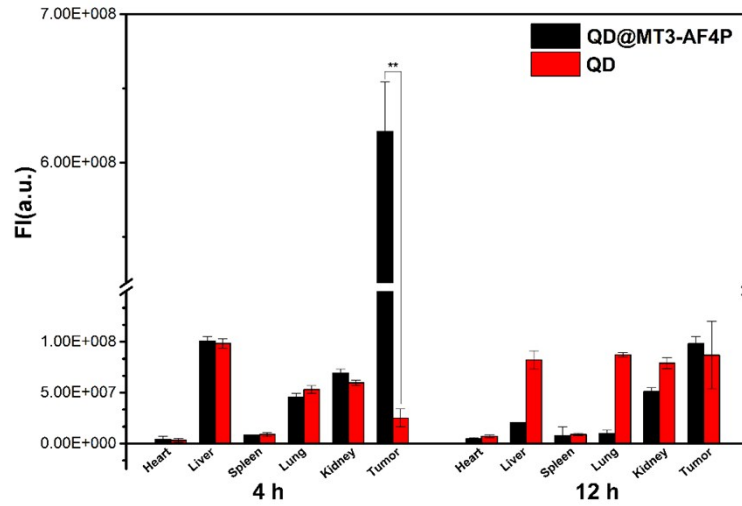

**Figure S12.** Analysis of the fluorescent intensity of QD@MT3-AF4p or QD in organs and tumor. Mice were sacrificed after injection of nanomaterials for 4 h and 12 h (n=3). \*\* represents p-value  $\leq 0.01$ .

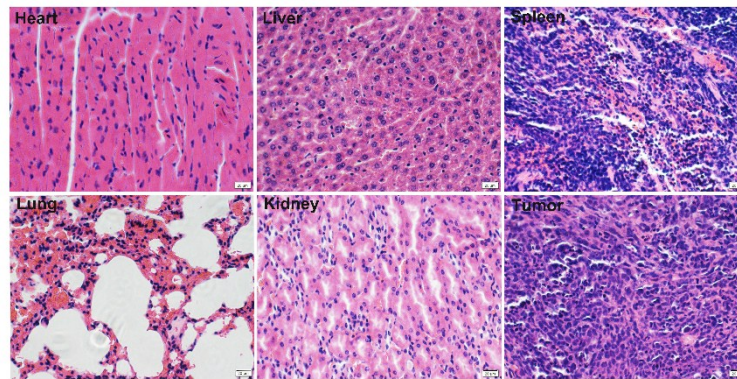

**Figure S13.** HE staining of main organs with 4 h post-injection of QD@MT3-AF4p. The scale bar is 20 nm.



**Table S1.** Zeta potentials showing MT3-AF4p is conjugated on nanomaterials successfully.

|                                      | zeta potential (mV) |           |
|--------------------------------------|---------------------|-----------|
| QD@SiO <sub>2</sub>                  | 14.0                |           |
|                                      | 14.2                | 14.1±0.1  |
|                                      | 14.1                |           |
| QD@SiO <sub>2</sub> -NH <sub>2</sub> | 14.9                |           |
|                                      | 14.9                | 14.8±0.1  |
|                                      | 14.7                |           |
| QD@SiO <sub>2</sub> -PAA             | -30.7               |           |
|                                      | -30.1               | -30.3±0.3 |
|                                      | -30.2               |           |
| QD@MT3-AF4p                          | -25.6               |           |
|                                      | -25.8               | -25.8±0.2 |
|                                      | -26.0               |           |
